# Supplementary material for: Purple Sweet Potato Color Attenuates Kidney Damage by Blocking VEGFR2/ROS/NLRP3 Signaling in High-Fat Diet-Treated Mice
Source: Hindawi journal article supplement (doi:10.1155/2019/5189819), 2019-01-21
Supplement: f1 [file 5189819.f1.docx]

**Supplementary Materials**

**Supplementary 1. Supplementary Figure S1: The transfection efficiency of adeno-associated viral (AAV2/9) in the kidney of HFD-treated mice.**

**
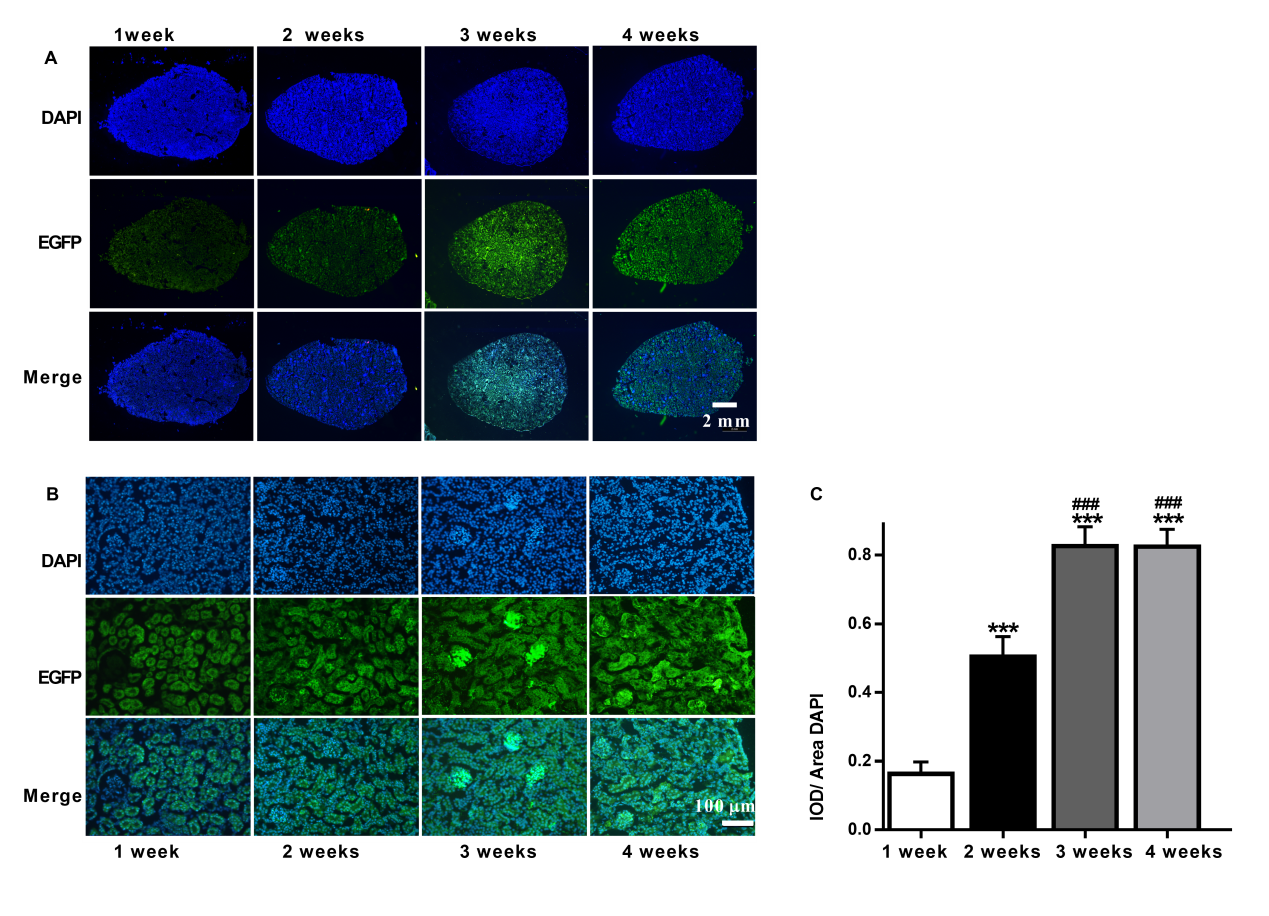
**

**Figure S 1: The transfection efficiency of adeno-associated viral (AAV2/9) in the kidney of HFD-treated mice**. (A) and (B) EGFP expression was determined by immunofluorescence staining after AAV2/9 transfection in mouse kidney. (Supplementary Figure 1A: 10×, scale bar, 2 mm; Supplementary Figure 1B: 200×, scale bar, 100 µm). (C) Relative intensity analysis of EGFP-positive cells in the kidney sections. All values are expressed as the mean ± SEM (n=5). ***p < 0.001 vs. values at 1 week, ###p < 0.001 vs. values at 2 weeks.

To determine the transfection efficiency of Adeno-associated viral (AAV2/9) in the kidney of HFD-treated mice, we determined EGFP positive cells in the kidney after 1-week, 2-weeks, 3-weeks and 4-weeks injection. Results showed that the immunofluorescence density of EGFP expressed by AAV2/9 reached peak after three-week transfection in the kidney of HFD-treated mice (Figure supplementary 1A-C). These results indicated that adeno-associated viral (AAV2/9) vectors encoding short hairpin RNAs (shRNAs) were successfully transfected the kidney, which provide favorable basis for carrying further experiments.

**Supplementary 2. Supplementary Figure S 2: Purple sweet potato color(PSPC) dosage selection.**

**
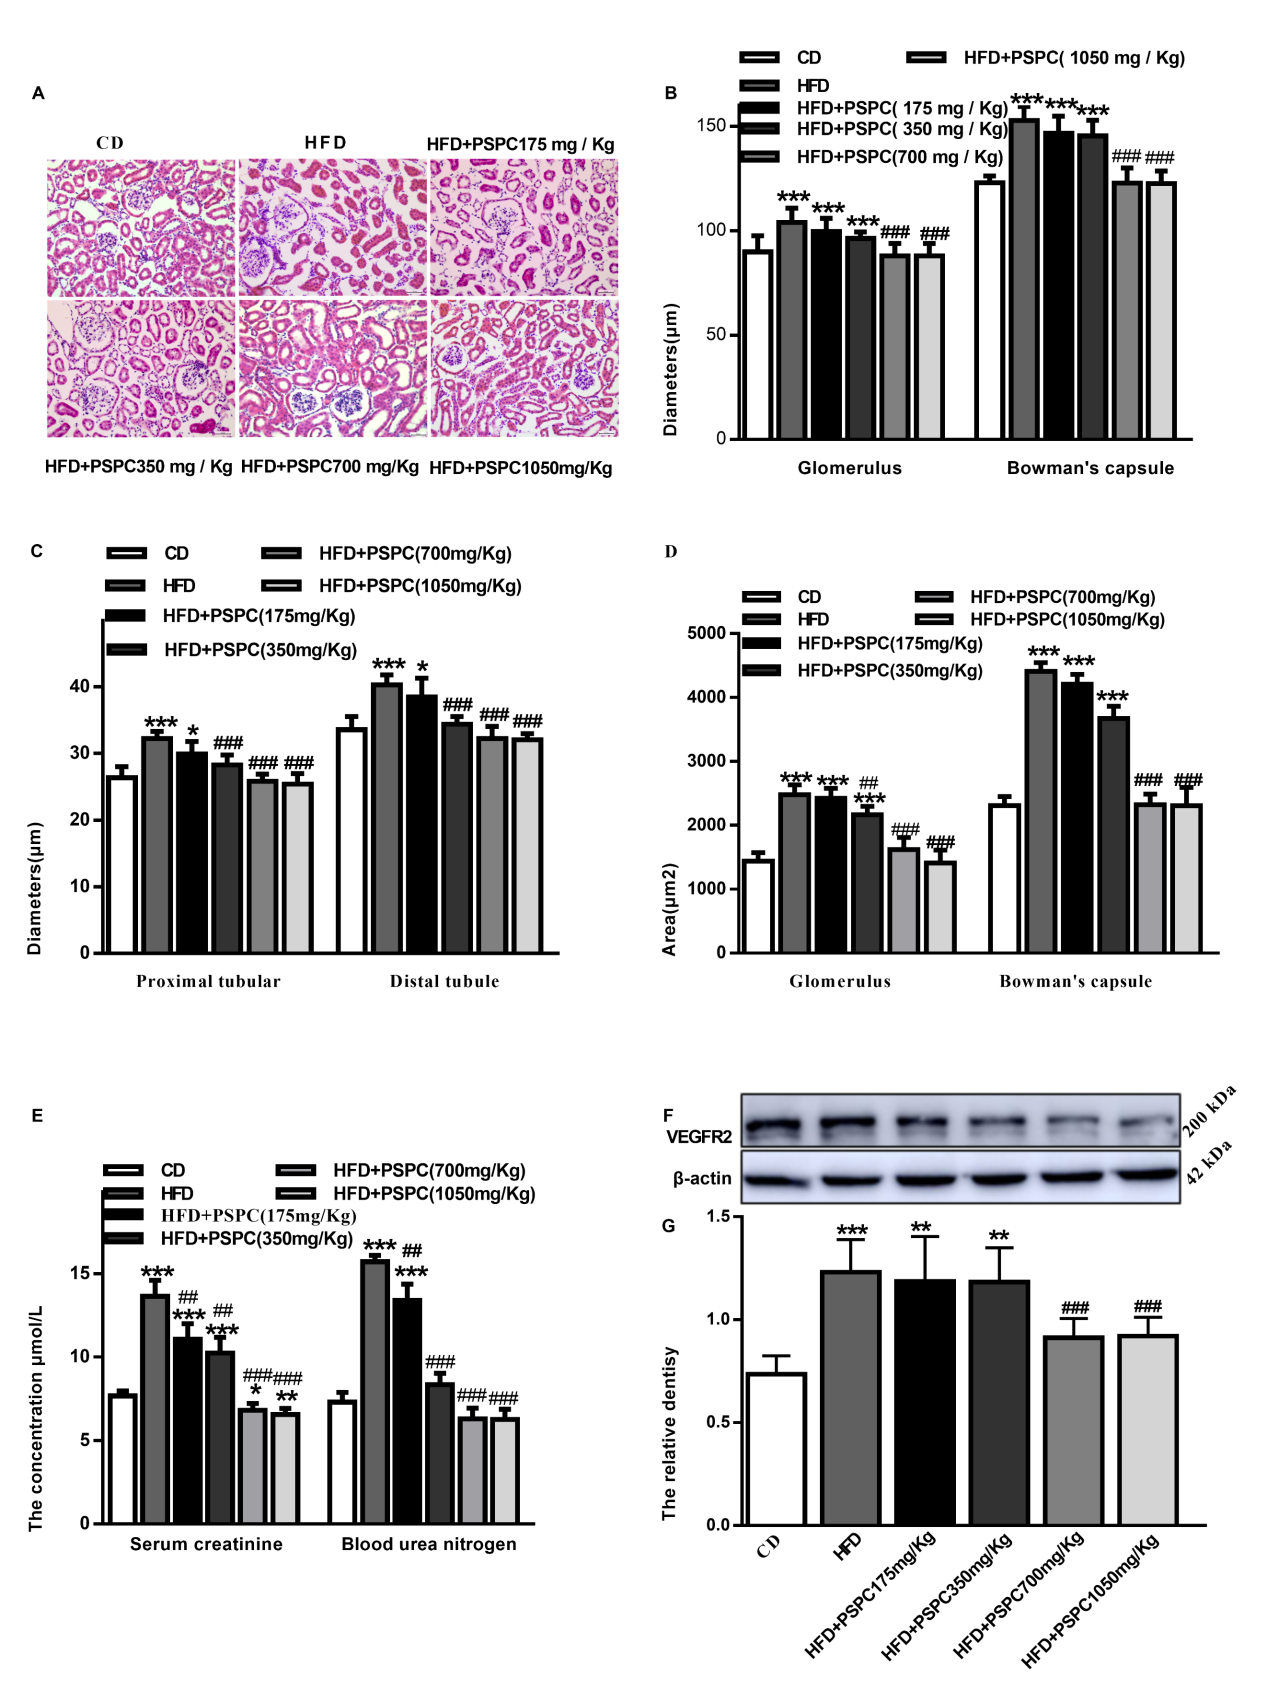
Figure S 2: Purple sweet potato color(PSPC) dosage selection.** (A) HE staining (200×, scale bar, 100 μm). (B) Glomerulus and Bowman’s capsule diameter was determined. (C) Tubules diameter was measured. (D) Glomerulus and Bowman’s capsule area was determined. (E) Serum creatinine and blood urea nitrogen determination. (F）Representative immunoblot for VEGFR2 and β-actin. (G) Relative densities of VEGFR2 are expressed as the ratio to β-actin. All values are expressed as the mean ± SEM (A-G, n=5). ***p < 0.001 vs. the CD group, ###p < 0.001 vs. the HFD group.

After 20-week-adminstration of HFD and PSPC, HE staining of kidney sections, serum creatinine and blood urea nitrogen were performed to examine what dose of PSPC can improve kidney injury induced by high fat diet(HFD). Results showed that loosened kidney structure, glomerulus hypertrophy, swelled tubules, severe inflammatory cells infiltration and thickened basement-membranes in the kidney of HFD-treated mice were all notably improved by 700 and 1050 mg/kg PSPC administration in compared with HFD group (Supplementary Figure S 2 A), but no significant different changes of above-mentioned morphology were observed between 700 and 1050 mg/kg PSPC administration. Consistent with this result, glomerular diameter, Bowman’s capsule diameter, proximal and distal tubule diameter, and glomerular area, Bowman’s capsule area in the kidney of HFD-treated mice were all reduced by 700 and 1050 mg/kg PSPC, these parameters also did not differ significantly between the two doses. Futhther determination of serum creatinine, blood urea nitrogen, and VEGFR2 protein expression obtained highly consistent trends of above results. These results indicating that 700 mg/kg PSPC not only ameliorated kidney injury, but also depressed renal VEGFR2 protein expression in HFD-treated mice.

**Supplementary 3. Supplementary Figure S 3: The flow chart of animal processing. Mice were 8-week-old and obtained from supplier.**


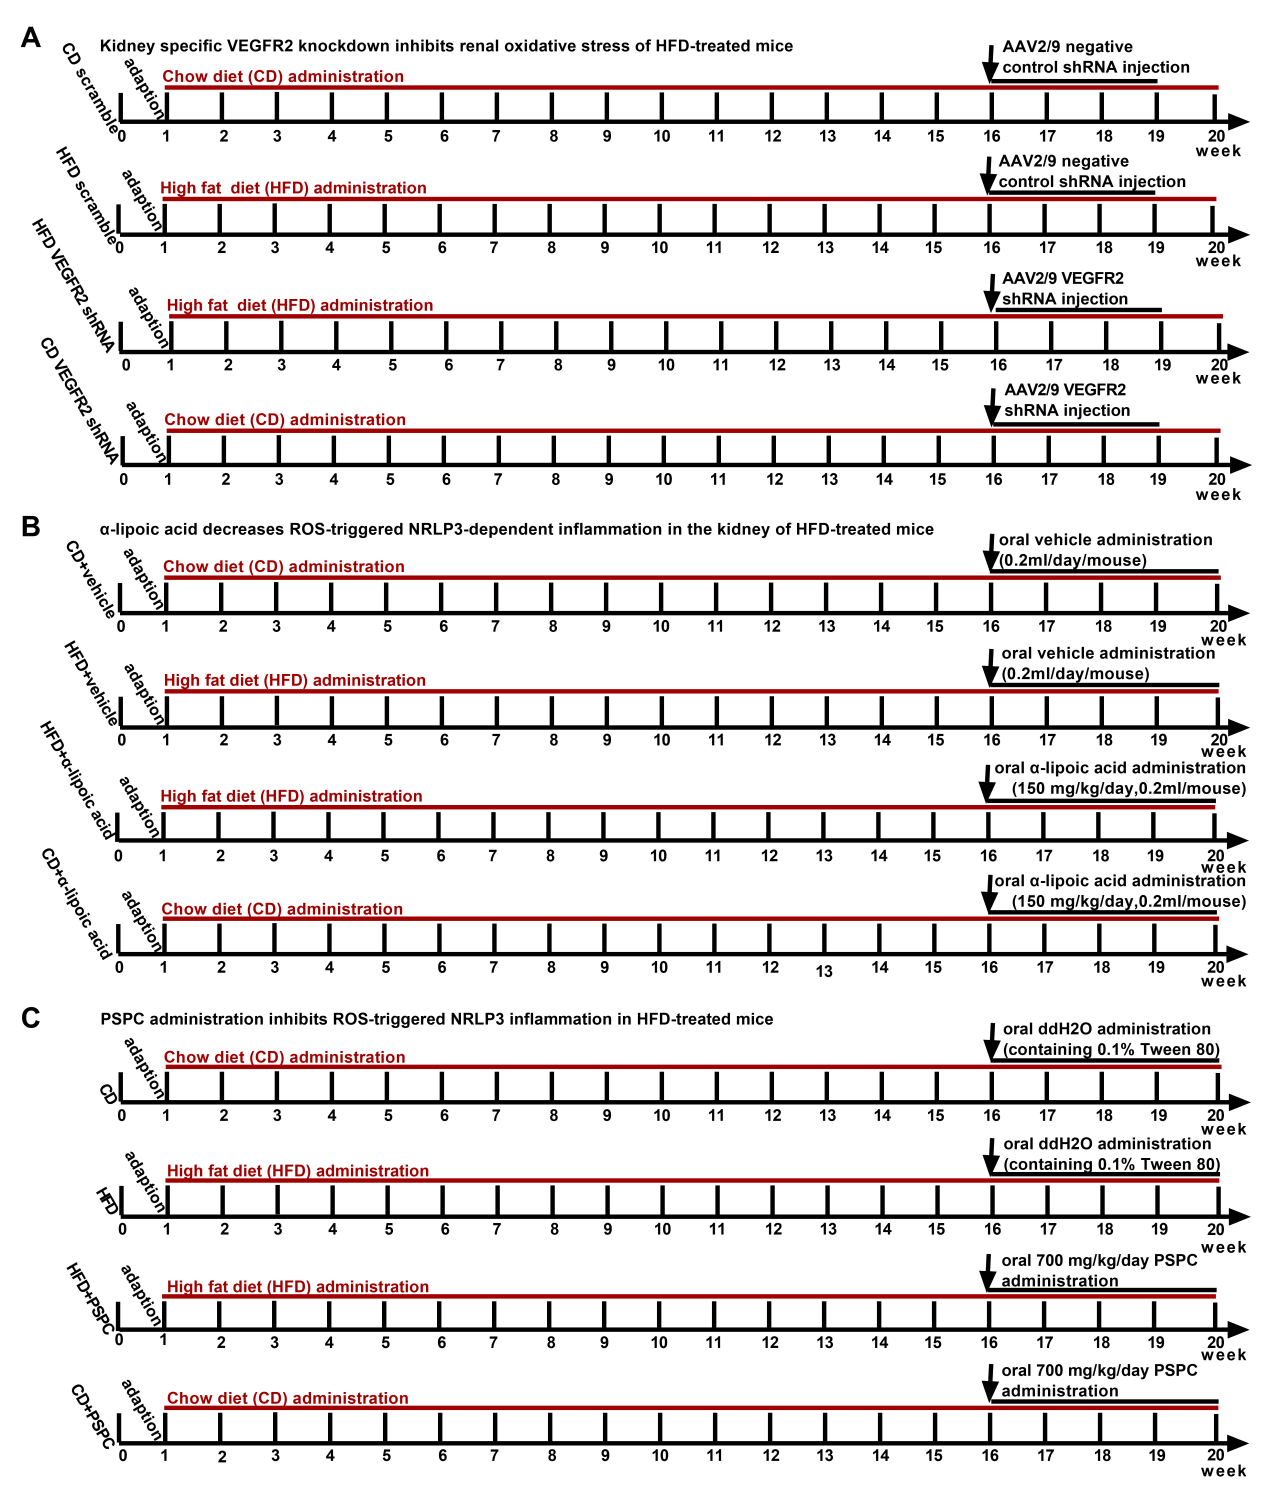


**Supplementary Figure S 3:**

**The flow chart of animal processing. Mice were 8-week-old and obtained from supplier.** (A) Kidney specific VEGFR2 knockdown inhibits renal oxidative stress of HFD-treated mice. (B) α-lipoic acid decreases ROS-triggered NRLP3-dependent inflammation in the kidney of HFD-treated mice. (C) PSPC administration inhibits ROS-triggered NRLP3 inflammation in HFD-treated mice.
